# Supplementary material
Source: Springer Nature journal article supplement (https://www.springermedizin.de/resource/supplementary/12936_2011_2023_MOESM1_ESM.pdf/9543162)

% of facilities with stock-out

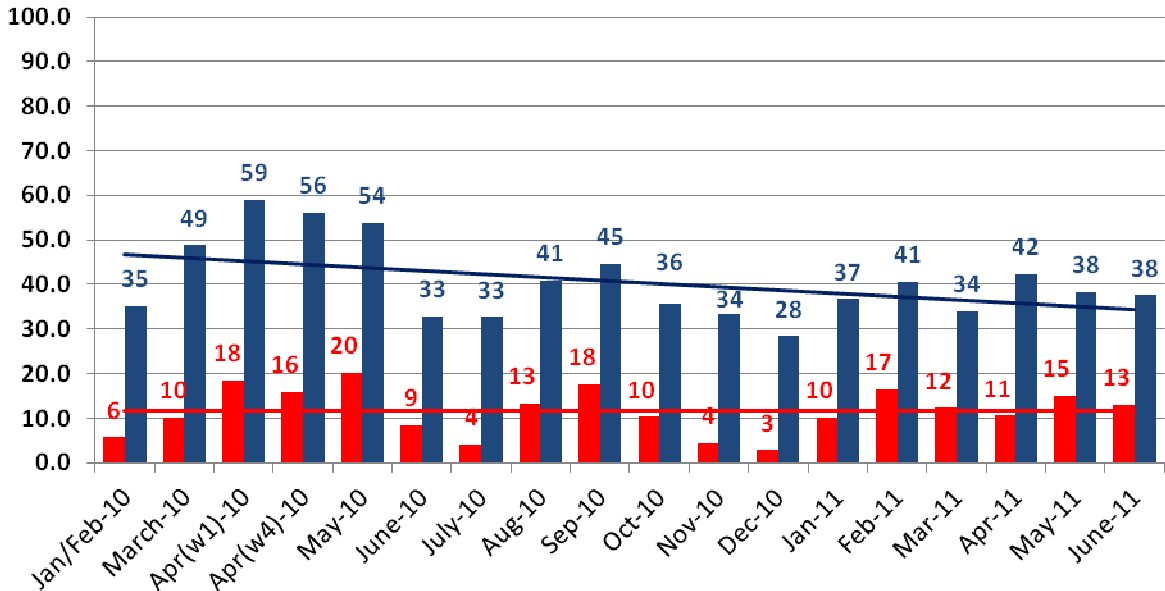

Supplement: MOESM1 [file 9543162]
